# Supplementary material for: Comparative Modeling and Analysis of Extremophilic D-Ala-D-Ala Carboxypeptidases
Source: MDPI journal article supplement (doi:10.3390/biom13020328), 2023-02-09
Supplement: s1 [file s1]

|                  |            |            |            |            |             |            |            |            |           |            |
|------------------|------------|------------|------------|------------|-------------|------------|------------|------------|-----------|------------|
| Q4FTU5_PSYA2     | MKQLPLTKQQ | LIAAMISLSL | GSVAQAALTI | NGSASSESSA | RLSWGGA DSL | SEARSIMSKS | GSSSTIKKVD | NGSSTTNITN | TTSFGSNNS | YNNANSYNTT |
| A0A106BYZ8_SHEFR | -----      | -----      | -----      | -----      | -----       | -----      | -----      | -----      | -----     | -----      |
| Q086W1_SHEFN     | -----      | -----      | -----      | -----      | -----       | -----      | -----      | -----      | -----     | -----      |
| Q8X665_ECO57     | -----      | -----      | -----      | -----      | -----       | -----      | -----      | -----      | -----     | -----      |
| Q3K9W6_PSEPF     | -----      | -----      | -----      | -----      | -----       | -----      | -----      | -----      | -----     | -----      |

|                  |            |             |             |             |              |             |            |             |             |            |
|------------------|------------|-------------|-------------|-------------|--------------|-------------|------------|-------------|-------------|------------|
| Q4FTU5_PSYA2     | YRGSFGNSNM | IPISTDSRSV  | AVIDAETGES  | IYEKDA DIAR | PMA SITK VMT | AMV VLDAGLD | MREELTLDPE | DFVGPKRASS  | NLKSGDRLNR  | AEMLLMALMK |
| A0A106BYZ8_SHEFR | --AAQAVQNK | PQQELASGSA  | MLVDLT TNEV | LYSSNP NQPV | PIASVTKLMA   | AMVTLDAKL P | LDEKISVKIT | DSPVMRNIYS  | RVRLDSVVTR  | ETMLLLTLMS |
| Q086W1_SHEFN     | --AAQAVQNK | PQQELASASA  | MLVDLT TNEV | LYSSNP NQPV | PIASVTKLMA   | AMVTLDAKLA  | LDEKISVKIT | DSPVMRNIYS  | RVRLGSVVTR  | ETMLLLTLMS |
| Q8X665_ECO57     | --KTAAATTA | SQPEIASGSA  | MIVDLNTNKV  | IYSNHPDLVR  | PIASISK LMT  | AMV VLDARLP | LDEKLKVDIS | QTP EMKGVYS | RVRLNSEISR  | KDMLLLALMS |
| Q3K9W6_PSEPF     | --TTAAPRDA | SQ LKIASGSA | LLMDLQT NKV | IYSSNP DVVV | PIASVSK LMT  | GLV VVEAHQN | MDEWIDVDIS | HTPEMKG VFS | RVKLRS ELPR | REMLLIALMS |

|                  |            |             |            |             |             |             |             |             |             |             |
|------------------|------------|-------------|------------|-------------|-------------|-------------|-------------|-------------|-------------|-------------|
| Q4FTU5_PSYA2     | SENPAAKSLA | RNYPGGYS AF | MRAMNRKAQE | LGMSTAFFGD  | PTGLDKRNIA  | SSNDLVKMVR  | AAGNYDVIRR  | FSTTKSYDFF  | VSNYASGNRT  | YKANNTSSLV  |
| A0A106BYZ8_SHEFR | SENRAATSLA | HNYPGGFKAF  | VRAMNDKATA | LGMSQTRYVE  | PTGLSPDNVS  | SANDLILLLK  | ASQTYPLL GK | LSSTTKKHV-  | --NFESP RYA | LDFQNTNKL V |
| Q086W1_SHEFN     | SENRAATSLA | HNYPGGFKAF  | VRAMNDKATA | LGMSQTRYVE  | PTGLSPDNVS  | SANDLILLLK  | ASQTYPLL GK | LSSTTKKHV-  | --NFESP RYA | LDFQNTNKL V |
| Q8X665_ECO57     | SENRAAASLA | HHYPGGYKAF  | IKAMNAKAKS | LGMNNT RFVE | PTGLSVHNVS  | TARDLT KLLI | ASKQYPLIGQ  | LSTTR EDMA- | --TFSNPTYT  | LPFRNTNHL V |
| Q3K9W6_PSEPF     | SENRAAASLA | HHYPGGYAAF  | IAAMNAKAKA | LGMTSTHFVE  | PTGLSER NVS | TARDLSKLLV  | AAHKQPLLIE  | LT TTKEKTV- | --SFRKPNYT  | LGFRNTDHL V |

|                  |             |             |             |              |            |             |             |             |            |       |
|------------------|-------------|-------------|-------------|--------------|------------|-------------|-------------|-------------|------------|-------|
| Q4FTU5_PSYA2     | RDGSYP IGIS | KTGFINEAGR  | CVVMETRVNN  | RP AII VILGA | NSSATRWGDA | KNILNSLATR  | RTV-----    | -----       | -----      | ----- |
| A0A106BYZ8_SHEFR | FKNNWNIALT  | KTGF TNKAGH | CLVMLTE MNK | RK VAFVVLDS  | FGKYTHMADA | NRLKNWLE TG | RTTPIPASAK  | AYKKQRQA IL | NNSI-----  | ----- |
| Q086W1_SHEFN     | FKNNWNIALT  | KTGF TNKAGH | CLVMLTE MNK | RK VAFVVLDS  | FGKYTHMADA | NRLKNWLE TG | RTTPIPASAK  | AYKKQRQA IL | NNSI-----  | ----- |
| Q8X665_ECO57     | YRDNWN IQLT | KTGF TNAAGH | CLVMRTVINN  | KPVALVVM DA  | FGKYTHFADA | SRLRTWIE TG | KVMPVPA AAL | SYKKQKAAQM  | AAAGQTAQND | ----- |
| Q3K9W6_PSEPF     | NKADWDIRIT  | KTGF TNPAGH | CLVLVTRMAN  | RPVALVILDA   | FGKYTHFADA | SRIRSWVETG  | KSANVPAVAQ  | QYKADKNLKS  | RQSGVIEASK | ----- |

XX signal sequence     
 ↓ ↓ active Ser residue     
 ● conserved residue  
XX signal cleavage site     
 ↓ ↓ active Lys residue     
 \* substrate binding residue
