# Supplementary material for: Comparative Modeling and Analysis of Extremophilic D-Ala-D-Ala Carboxypeptidases
Source: MDPI journal article supplement (doi:10.3390/biom13020328), 2023-02-09
Supplement: s1 [file s1]

|                  |       |         |         |         |        |           |         |         |             |            |          |         |         |         |            |              |              |           |         |
|------------------|-------|---------|---------|---------|--------|-----------|---------|---------|-------------|------------|----------|---------|---------|---------|------------|--------------|--------------|-----------|---------|
| Q4FTW2_PSYA2     | ----- | ---MTV  | KRVK    | KQLVQ   | -LVVG  | VSI-----  | -----   | SM      | SAVMASAAIQ  | QPE        | EMANTAYV | LMD     | YNTG    | GEIL    | AQK        | NANQALP      | PASLTKMMTS   |           |         |
| A0A0H3JIB3_ECO57 | ----- | -----   | ---MKRR | LIIA    | ASLF   | IFNLSS    | -----   | GF      | AAENIPFSPQ  | PEE        | IHAGSWV  | LMD     | YTTG    | QIIL    | TAGNE      | HQQRN        | PASLTKLMTG   |           |         |
| Q3K6A1_PSEPF     | ----- | -----   | ---MN   | ITFFA   | -KRL   | CLLVP-    | LL----  | LSP     | AAPFAAEMMPS | PPQ        | LAAKSYV  | LMD     | ANS     | GNVL    | VENNG      | DQRLP        | PASLTKLMTA   |           |         |
| A1SZ14_PSYIN     | MIRKY | FYSNH   | SQVS    | FMKKIS  | E----- | -L-VT     | -ALIF   | -----   | SFN         | LFANPTITPS | APE      | I       | GAKGYL  | LID     | FNSGKVL    | SENNS        | DVRLN        |           |         |
| Q3IJ78_PSET1     | ----- | ---MKS  | IK      | HKILN   | -G-VC  | -GLVC     | SAAV-   | -----   | -----       | FSATAQIIPA | PPQ      | VNAKGYF | LVD     | F       | TGKVI      | AQGEAD       | TKLA         |           |         |
| A0A119D0G3_SHEFR | ----- | -----   | -----   | -----   | -----  | -----     | -----   | -----   | MRPT        | PNRAPMVT   | PD       | APS     | VAAKAYV | LMD     | YNSGRVI    | AENAYESLN    | PASLTKMMTS   |           |         |
| Q087L2_SHEFN     | ----- | ---MNT  | SKT     | AQL     | TTML   | -FA       | -SVVC   | SSLA    | ATPQ        | PD         | IRPT     | PNR     | APMVT   | PD      | APS        | VAAKAYV      | LMD          | YNSGRVI   |         |
| Q8X6U3_ECO57     | ----- | ---MTQY | -----   | SSLLR   | G      | LAAG      | -SAFL   | FLFAP   | TA-----     | FA-        | -----    | AEQ     | TVE     | APS     | V          | DARAWI       | LMD          | YASGKVL   |         |
| DACA_ECO57       | ----- | ---MNT  | IFS     | ARIM    | KRLALT | -TALC     | TAFIS   | AA----- | HAD         | DLN        | IKTMIPG  | VPQ     | IDA     | ESYI    | LID        | YNSGKVL      | AEQ          | NADVRRD   |         |
| Q4FTW2_PSYA2     | YIIE  | QRLASG  | DLKET   | DQVLM   | SPN    | AWCRGS-   | --NSQ   | SCMYV   | PVN         | KSAS       | VID      | MLRG    | IIIQSG  | ND      | ASKAMAEH   | IAGSEASFAI   | LMNE         | QAQKIG    |         |
| A0A0H3JIB3_ECO57 | YVV   | DRAIDSH | RITPD   | DDIVTV  | GRD    | AWAKDNP   | VVF     | VSSLMFL | KEG         | DRVSVRD    | LSR      | GLIV    | DVSG    | ND      | ACVALADY   | IAGGQRQFVE   | MMN          | NYAEKLH   |         |
| Q3K6A1_PSEPF     | YIAT  | LEIRRG  | QIGEN   | DPVTV   | SEN    | AWRTG--   | ---GSR  | RMFI    | KVG         | SQVTVSD    | LLH      | GIIIQSG | ND      | ASVAAEH | IAGSEDAFAD | LMN          | KTVADLG      |           |         |
| A1SZ14_PSYIN     | YIIG  | QEIKSG  | NLSPD   | DDKVTI  | SEK    | AWSKNF-   | --PES   | KMFI    | EVG         | KEVS       | VAD      | LNR     | GIIIQSG | ND      | ACVAAEY    | IAGSEGAFAFAD | LMNS         | WAAQLG    |         |
| Q3IJ78_PSET1     | YVIG  | TEVKAG  | NIAP    | TD      | DMVTV  | SEK       | AWAKNF- | --PES   | KMFI        | EVG        | KQIS     | VDD     | LNR     | GIIIQSG | ND         | ACVAAEH      | IAGSEGAFAFAD | LMN       | HAAKLIG |
| A0A119D0G3_SHEFR | YVIG  | HEIRVG  | NISL    | DDDDVAI | TKN    | AWAKNF-   | --PDS   | KMFI    | EVG         | KTVKVHD    | LNR      | GIIIQSG | ND      | ACVAAEH | IAGTEGA    | FVDF         | LMNS         | WAKQLG    |         |
| Q087L2_SHEFN     | YVIG  | HEIRVG  | NISL    | DDDDVAI | TKN    | AWAKNF-   | --PDS   | KMFI    | EVG         | KTVKVHD    | LNR      | GIIIQSG | ND      | ACVAAEH | IAGTEGA    | FVDF         | LMNS         | WAKQLG    |         |
| Q8X6U3_ECO57     | YVVG  | QALKAD  | KIKLT   | DMVTV   | GKD    | AWATGNP   | ALR     | GSSVMFL | KPG         | DQVSVAD    | LNK      | GVI     | IQSG    | ND      | ACIALADY   | VAGSQESFIG   | LMNG         | YAKKLIG   |         |
| DACA_ECO57       | YVIG  | QAMKAG  | KFKET   | DLVTI   | GND    | AWATGNP   | VFK     | GSSLMFL | KPG         | MQVPVSQ    | LIR      | GIN     | IQSG    | ND      | ACVAMADF   | AAGSQDAFVG   | LMNS         | YVNALG    |         |
| Q4FTW2_PSYA2     | GMPE  | EGHQAS  | ALD     | LAKLSRA | IIK    | NSGDY●    | IYSE    | KEFTYN  | GIT         | QGNRNL     | G        | LATD    | -PTVDG  | LKT     | GHTD       | DAAG         | YCLA         | ASSNRE    |         |
| A0A0H3JIB3_ECO57 | GLD   | APGQHSS | AYDL    | LAFLSRA | IIH    | GEPEFYH   | MYSE    | KSILTWN | GIT         | QGNRNL     | G        | LWD     | KTMNV   | DG      | LKT        | GHTSGAG      | FN           | LIASAVDG  |         |
| Q3K6A1_PSEPF     | GLPN  | PEHYSS  | AHD     | MAILARA | IIH    | EDPAHYA   | IYS     | QKEFFWN | GIK         | QPNRNL     | L        | LWRD    | -KTVDG  | LKT     | GHTD       | DEAG         | Y            | CMVSSAVRD |         |
| A1SZ14_PSYIN     | GLTA  | EGHYTT  | PHD     | MAILAQA | LIN    | DVPEYL    | IYSE    | KSFKN   | GID         | QPNRNL     | L        | LWD     | KSLD    | V       | DG         | IKT          | GHTNREAG     | YSL       | LISATK  |
| Q3IJ78_PSET1     | GLD   | DAHYYT  | PRD     | MATLGA  | LIR    | DVPEYA    | LYK     | KSFTYN  | GIK         | QYNRNL     | L        | LWD     | DES     | L       | V          | DG           | IKT          | GHTSDAG   |         |
| A0A119D0G3_SHEFR | GLD   | SENHKT  | AYD     | MAILGAA | LIR    | DVPEEYK   | VYSE    | KSF     | TYN         | GIK        | QYNRNL   | L       | LWD     | KSLN    | V          | DG           | IKT          | GHTSGAG   |         |
| Q087L2_SHEFN     | GLD   | SENHKT  | AYD     | MAILGAA | LIR    | DVPEEYK   | VYSE    | KSF     | TYN         | GIK        | QYNRNL   | L       | LWD     | KSLN    | V          | DG           | IKT          | GHTSGAG   |         |
| Q8X6U3_ECO57     | GLD   | APGFST  | ARD     | MALLGKA | LIH    | DVPEEYA   | IHKE    | KEFTFN  | KIR         | QPNRNL     | L        | LWSS    | NLN     | V       | DG         | MKT          | GTTAGAG      |           |         |
| DACA_ECO57       | GLD   | ADGQYSS | ARD     | MALIGQA | LIR    | DVPEEYS   | IYKE    | KEFTFN  | GIR         | QLNRNL     | L        | LWD     | NSLN    | V       | DG         | IKT          | GHTDKAG      |           |         |
| Q4FTW2_PSYA2     | SRELL | NWGF    | HFTTV   | TQAPA   | GQF    | VSKVPVW   | FGE     | AKEIEV  | TAD         | NLQILT     | K        | TQKN    | KISTV   | ID      | IP         | E-SLEA       | PIKK         | QGEIGK    |         |
| A0A0H3JIB3_ECO57 | ARK   | LLRWGQ  | NFTTV   | QILHR   | GKK    | VGTERIW   | YGD     | KENIALG | TEQ         | EFWMVLP    | KAE      | IPHIKAK | Y       | TL      | DG         | KE           | PIA          | HQVRVGE   |         |
| Q3K6A1_PSEPF     | TQK   | LLTYGFR | FFET    | QTFYQK  | GTE    | LAQAPVW   | KGT     | TSQVKAG | LAQ         | DLTMTLP    | KGQ      | LKKLAAS | MT      | MNP     | -QLTA      | PIAKG        | DVIGK        | VEV       |         |
| A1SZ14_PSYIN     | SKK   | LLNWGFR | FFET    | LTPYNA  | GDQ    | LANERIW   | MGS     | QPMIRLG | VKD         | DDPITLPL   | RGE      | AKNL    | TAN     | FI      | EN-ELRA    | PIQKG        | DVVGK        | VNY       |         |
| Q3IJ78_PSET1     | SKK   | LLNYGFR | FYET    | ITPYKA  | GDS    | FAEQRIW   | MGN     | KENVSLG | I           | LED        | TPITIP   | RGQ     | HKNL    | KAN     | FKLDN      | -TLEA        | PLAKG        | TKVGT     |         |
| A0A119D0G3_SHEFR | SKK   | LLNYGFR | FFET    | ITPYKA  | GDT    | FVTQQIW   | YGD     | RETVDLG | VMT         | DPITIS     | RGK      | AKDL    | QAN     | FEL     | TK-PLTA    | PLAKG        | ETVGR        | VFF       |         |
| Q087L2_SHEFN     | SKK   | LLNYGFR | FFET    | ITPYKA  | GDT    | FVTQQIW   | YGD     | RETVDLG | VMT         | DPITIS     | RGK      | AKDL    | QAN     | FEL     | TK-PLTA    | PLAKG        | ETVGR        | VFF       |         |
| Q8X6U3_ECO57     | SEK   | LLTWGFR | FFET    | VTPIKP  | DAT    | FVTQRVW   | FGD     | KSEVNLG | AGE         | AGSVTIP    | RGQ      | LKNL    | LKAS    | Y       | TL         | TEPQLTA      | PLKKG        | QVVG      |         |
| DACA_ECO57       | SKK   | LLTWGFR | FFET    | VNPLKV  | GKE    | FASFPVW   | FGD     | SDRASLG | V           | DKD        | VYLTIP   | RG      | RKDL    | LKAS    | Y          | VLN          | SS           | ELHA      |         |
| Q4FTW2_PSYA2     | VIAT  | SDIEQS  | GFMS    | RIWQRF  | SRWA   | QNLF--    | ---     | ---     | ---         | ---        | ---      | ---     | ---     | ---     | ---        | ---          | ---          | ---       |         |
| A0A0H3JIB3_ECO57 | LVT   | LESV    | GE      | G       | SMFS   | RSLSDYF   | HHKA    | -----   | ---         | ---        | ---      | ---     | ---     | ---     | ---        | ---          | ---          | ---       |         |
| Q3K6A1_PSEPF     | LIAL  | DAVEEG  | GIF     | RRMWD   | SI     | RLFFYGLFN | ---     | ---     | ---         | ---        | ---      | ---     | ---     | ---     | ---        | ---          | ---          | ---       |         |
| A1SZ14_PSYIN     | LIAL  | ETVEEG  | GLFS    | R       | LIDYI  | KLL       | FIGWFS  | ---     | ---         | ---        | ---      | ---     | ---     | ---     | ---        | ---          | ---          | ---       |         |
| Q3IJ78_PSET1     | LVT   | LEEVEEG | SFFS    | KIYDYL  | RLQ    | IMQ       | ---     | ---     | ---         | ---        | ---      | ---     | ---     | ---     | ---        | ---          | ---          | ---       |         |
| A0A119D0G3_SHEFR | LVT   | LNVEEG  | GLFS    | K       | LMDFY  | KQMFASWFE | ---     | ---     | ---         | ---        | ---      | ---     | ---     | ---     | ---        | ---          | ---          | ---       |         |
| Q087L2_SHEFN     | LVT   | LNVEEG  | GLFS    | K       | LMDFY  | KQMFASWFE | ---     | ---     | ---         | ---        | ---      | ---     | ---     | ---     | ---        | ---          | ---          | ---       |         |
| Q8X6U3_ECO57     | LIV   | MENVEEG | GF      | FRMWD   | FV     | MMK       | FHQWFGS | WFS     | ---         | ---        | ---      | ---     | ---     | ---     | ---        | ---          | ---          | ---       |         |
| DACA_ECO57       | LVL   | QEIEEG  | NFFG    | KI      | DIYI   | KLM       | FHHWFG- | ---     | ---         | ---        | ---      | ---     | ---     | ---     | ---        | ---          | ---          | ---       |         |

signal sequence

active Ser residue

conserved residue

signal cleavage site

active Lys residue

substrate binding residue
