# Supplementary material for: Comparative Modeling and Analysis of Extremophilic D-Ala-D-Ala Carboxypeptidases
Source: MDPI journal article supplement (doi:10.3390/biom13020328), 2023-02-09
Supplement: s1 [file s1]

Q3KFC3\_PSEPF ----- MTK-S-LRP LLLAGLLLP ALPVA--AT INT----- --ALTP NV-----EKA LKASKLQPSA LSLVMVPLDG  
DACC\_BACSU ----- -MK-KSIKLY VAVILLFVVA SVPYMHQAA AAE-----KQ -----DALSG QIDKIL----ADHPALEGAM AGITVRSAT  
A0A106C1X3\_SHEFR MNSILFCLPQ PRFFHQPQL QFT----QA LCLLGAPITS SLPNVSLAAE VPNQIALSQ QTIHSDNINQ QPTAVYLDNM LQLLKPASQ LGITVWDMTT  
Q082P9\_SHEFN MNSILFCLPQ PRFFHQPQL RFT----QA LCLLGAPITS SLPNVSLAAE VPSQVALSQ QTIHSDNINQ QPTALYLDNM LQLLKPASQ LGITVWDMTT  
A1SZR5\_PSYIN ----- MFK-----RI LCFAL--F LLPVNLADQ W-----SA LHALLPKGTQ LSYLLDPAN  
Q8X9K8\_ECO57 -----M RFSRFIIGLT SCIAF--S -----VQAN V----- --DE YITQLPAGAN LALMVQKVGA

Q3KFC3\_PSEPF PGTPTVYNAD VSVNPASTMK LVTTYAALM LGPNHQWTE FYT----- DGDNLGGILN GNLYLKGGD PKLNMEKLWL LMRDLRANGV TQVTDGLVD  
DACC\_BACSU GAVLYEHSQ TRMRPASSLK LLTAAALSV LGENYSFTTE VRT----- DGTLKGGKLN GNLYLKGGD PTLTPSDFDK MAEILKHSV KVIKGNLIGD  
A0A106C1X3\_SHEFR QKTVEFYNNQ SLMQPASVQK LLTALAATKQ LGKDFTYQTR LTTLAQQPLD KSLIENGYS GDIIYEFSGD PTLKYQDLRQ LLASLSQLGI TELTGNIVLT  
Q082P9\_SHEFN QKTVEFYNNQ SLMQPASVQK LLTALAATKQ LGKDFTYQTR LTTLAQQPLD KSLIENGYS GDIIYEFSGD PTLKYQDLRQ LLASLSQLGI TELTGNIVLT  
A1SZR5\_PSYIN NQLLAESNAE ILRTPASLQK LLTATAAKLY LGENFRYQTT LBG-----N KSHLKNHNYQ GDILRLRFVGD PTLRSLADKE MLTSFKALGV KQIRGDLIN  
Q8X9K8\_ECO57 SAPAIDYHSQ QMALPASTQK VITALAALIQ LGPDFRFTTT LET----- KGNVENGVK GDLVARFGAD PTLKRQDIRN MVATLKKSGV NQIDGNVLID

Q3KFC3\_PSEPF RSFFVQPQL- PE---FNDGN \* D---ENKPF L VKPDSLLVN KALRFVARND NGRVLISVE PIASININEN-----T VKAL-----N  
DACC\_BACSU DTWHDDMRSL PDMPWDEYT YYGAPISALT ASPNEDYDAG TVIVEV---T PNQ-KEGEEP AVSVSPKTDY ITI-----KND AKTTAAGSE-  
A0A106C1X3\_SHEFR SEQ-DSQLQA PGWVWDDLGI CYAAPISPF IDKNVYGR L ATTGYN-KVA NIT-MMGNRP -IEISNDAYF VTPIVNRPVA KPAVQTLTDE VVLPAYLTES  
Q082P9\_SHEFN SEQ-DSQLQA PGWVWDDLGI CYAAPISPF IDKNVYGR L ATTGYN-KVA NIT-MMGNRP -IEISNDAYF VTPIVNRPVA KPAVQTLTDA VVLPAYLTES  
A1SZR5\_PSYIN AAHFSGYQWS DGGAWNLDLV CYTSPSNAI VNRNLCVLGN SVVSDAKKA RLF-IPSYEP -IEISSNDYF ---VVTSQRD  
Q8X9K8\_ECO57 TSIFASHDKA PGWPWNMTQ CFSAPPAVAI VDRNCFVSL YSAPKPGDMA FIR-VASYYP -VTMFSQVR-----TLPRGSAE

Q3KFC3\_PSEPF SKQ\* TGGVRY NPVPQADGSV TVTVAGQL-G EG\*-----S SQTYSLLDH ATYTAGAVRA IWKELGSIQ GKDRLA--- --PTPSSAKM LARAFSPDLA  
DACC\_BACSU ---KDLTIE- ---RHGHTN TITTEGSPVP DA-----NKTKE ---WISWVEP AGYALDLFKQ SLKKQGIVK GDKTGE--- --APSSSDV LLSHRSMPLS  
A0A106C1X3\_SHEFR VPQ\* QLTLS- ---RFDNN RYHLSG- ---CHVG-AKS LPLAIAITEP QLYAQQIVAK QLASLGIVHQ LPITASIMNT EAQFMAQRQV IASHQSAALP  
Q082P9\_SHEFN VPQ\* QLTLS- ---RFDNN RYHLSG- ---CHVG-AKS LPLAIAITEP QLYAQQIVAK QLASLGIVHQ LPITASIMNT EAQFMAQRQV IASHQSAALP  
A1SZR5\_PSYIN EQFCALKMT- ---RNSDN RYHLWG- ---CMVPRNRP FGLAFSVNDP FAYASQIIES ELKNVGIKLT GKVKIEQ--- IKTAKKVSQV LVKYQSPELG  
Q8X9K8\_ECO57 AQYCELDVV- ---PGDLN RFTLTG- ---CLPQRSEP LPLAFAVQDG ASYAGAILKD ELKQAGITWS GTLLRQT--- --QVNEPGTV VASKQSAPLAG

Q3KFC3\_PSEPF EIIRDINKYS NNTMAQQFL SLGQKFRNDA DGDDAKAAQR VVRQWL-AKK GITAPHLVME NGSGLSR SER VSAREMANML QAAWHSPYAA EYISSLPAG  
DACC\_BACSU KLFVPFMKLS NNGHAEVLVK EMGKVK-K-G EGSEWEGLE- VLNSTL-PEF GVDSSKSLVLR DSGGISHIDA VSSDQLSLL YDQDQSWFS AXLNSLPVAG  
A0A106C1X3\_SHEFR QLLETMLLKS DNLIADSLK KLGEVYYQ-A PSDFARSQ- ALKTLT-YSI GIDLNSANIA DSGSLSRYNL LTPHVLVSVL TTLYQQPEYR FLLELLPQSG  
Q082P9\_SHEFN QLLETMLLKS DNLIADSLK KLGEVYYQ-A PSDFARSQ- ALKTLT-YSI GIDLNSANIA DSGSLSRYNL LTPHVLVSVL TTLYQQPEYR FLLELLPQSG  
A1SZR5\_PSYIN KLLIIMLKDS DNLIADSLF KTLGAAYFQ-Q DGNFWRLAGAK- ALKLIL-QEN GVDLENAYLA DSGSLSRHNL MSAKLFMTVL KYVYQNDAKL NLLDSFSIAG  
Q8X9K8\_ECO57 DLLKIMLKKS DNMIADTVFR MIGHARFN-V PGTFRAGSD- AVRQGLTIA GVDIGNTIIA DSGSLSRHNL TAPATMMQVL QYIAQHNEI NFISMLPLAG

Q3KFC3\_PSEPF TDGTM----- RKRLKTTAMR GEAHVKTG\* NTVRAITAGFS RDVNGNTWAV VAILNDKAPF GASSV----- -LD-QVL LDLYKQPRTA QTASVL  
DACC\_BACSU NPDRMVGGLT RNRMGTPAQ GKVRKGTGSL STVSSLSGYA ETKSGKKLVF SILLNGLIDE EDGKDIEDQI AVILANQ--- -P---FSAVFL QTMMDVPR--  
A0A106C1X3\_SHEFR VSGTL-----RY KRYFNKSPKL NHVFAKTGSM LGIANLAGRV NASNGHDYLF VLFENGLSPQ IKKQK---A P---FSAVFL QTMMDVPR--  
Q082P9\_SHEFN VSGTL-----RY KRYFNKSPKL NHVFAKTGSM LGIANLAGRV VLFENGLSPQ IKKQK---A P---FSAVFL QTMMDVPR--  
A1SZR5\_PSYIN VDGTL-----HY HKGVAGPLK GNIVAKTGS M KGVANLLGIV KTARGERLF- ALIINGYNWP ETDLTAKTS PVVIFEHAF ETIKSSRK-----  
Q8X9K8\_ECO57 YDSSL-----QY RAGLHQAGVD GKVSAKTGS L QGVYNLAGFI TTASQGRMAF VQYLSGAYE PAD-QNRRI PLVRFERSLY KDIYQNN-----

signal sequence ↓↓ active Ser residue ● conserved residue  
XX signal cleavage site ↓↓ active Lys residue \* substrate binding residue
