# Supplementary material for: Comparative Modeling and Analysis of Extremophilic D-Ala-D-Ala Carboxypeptidases
Source: MDPI journal article supplement (doi:10.3390/biom13020328), 2023-02-09

Count

60  
80  
100  
120  
140

P38422DAC\_BACSU  
Q5KXJ0\_GEOKA  
A4XK96\_CALS8  
Q5L3Y3\_GEOKA  
P08750DAC\_BACSU  
B9KYG0\_THERP  
B9KY91\_THERP  
P35150DAC\_BACSU  
Q5KXL5\_GEOKA  
A4XKJ5\_CALS8  
Q3IJ78\_PSET1  
A1SZ15\_PSYIN  
Q3K6A1\_PSEPF  
Q4FTW2\_PSYA2  
P0AEB4DAC\_ECO57  
Q8X6U3\_ECO57  
A0A0H3IB3\_ECO57  
Q087L2\_SHEFN  
A0A119D0G3\_SHEFR  
Q8X665\_ECO57  
Q3K9W6\_PSEPF  
Q4FTU5\_PSYA2  
Q086W1\_SHEFN  
A0A106BYZ8\_SHEFR  
Q8XBJ0\_ECO57  
A0A106C1X3\_SHEFR  
Q082P9\_SHEFN  
A1SWN9\_PSYIN  
A1SZR5\_PSYIN  
Q8X9K8\_ECO57  
Q3KFC3\_PSEPF  
P39844DAC\_BACSU

Thermophile  
Mesophile  
Psychrophile

H-Bonds

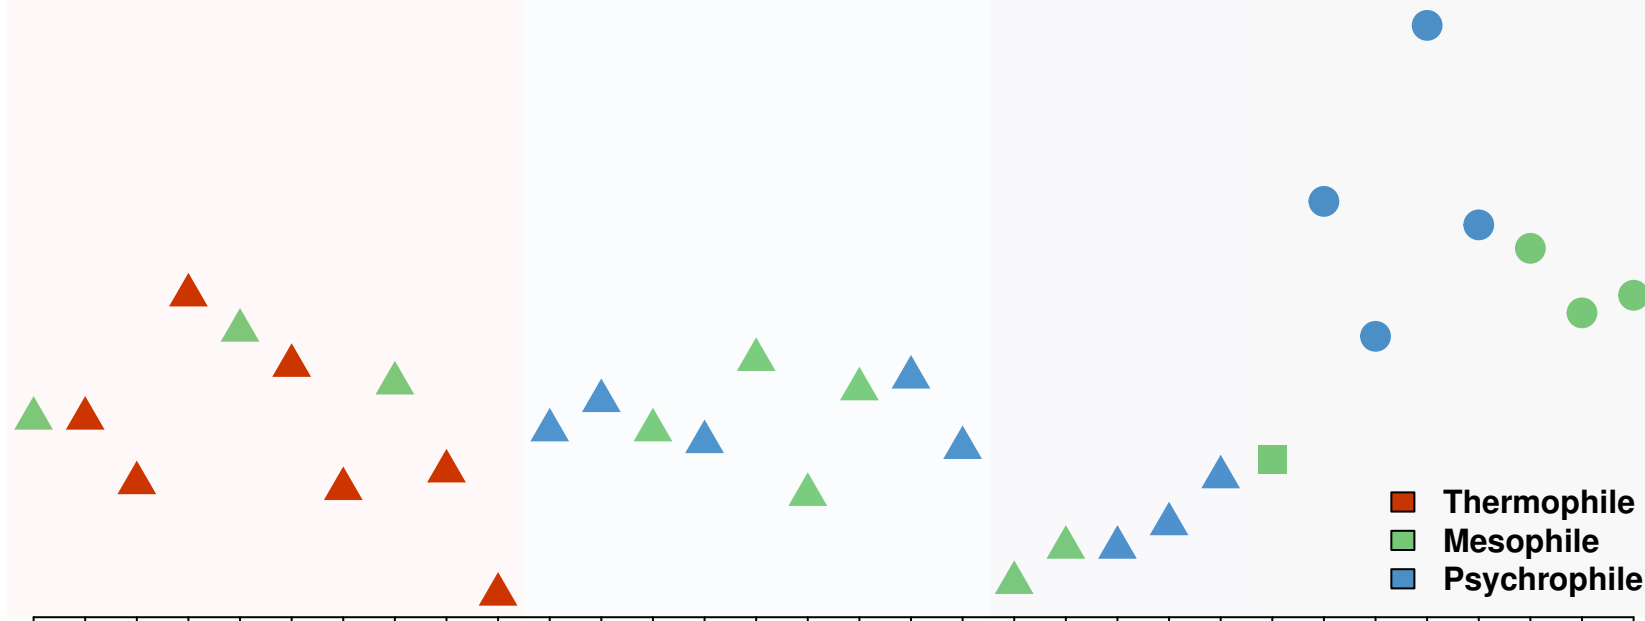

Supplement: s1 [file s1]
