# Supplementary material for: Comparative Modeling and Analysis of Extremophilic D-Ala-D-Ala Carboxypeptidases
Source: MDPI journal article supplement (doi:10.3390/biom13020328), 2023-02-09
Supplement: s1 [file s1]

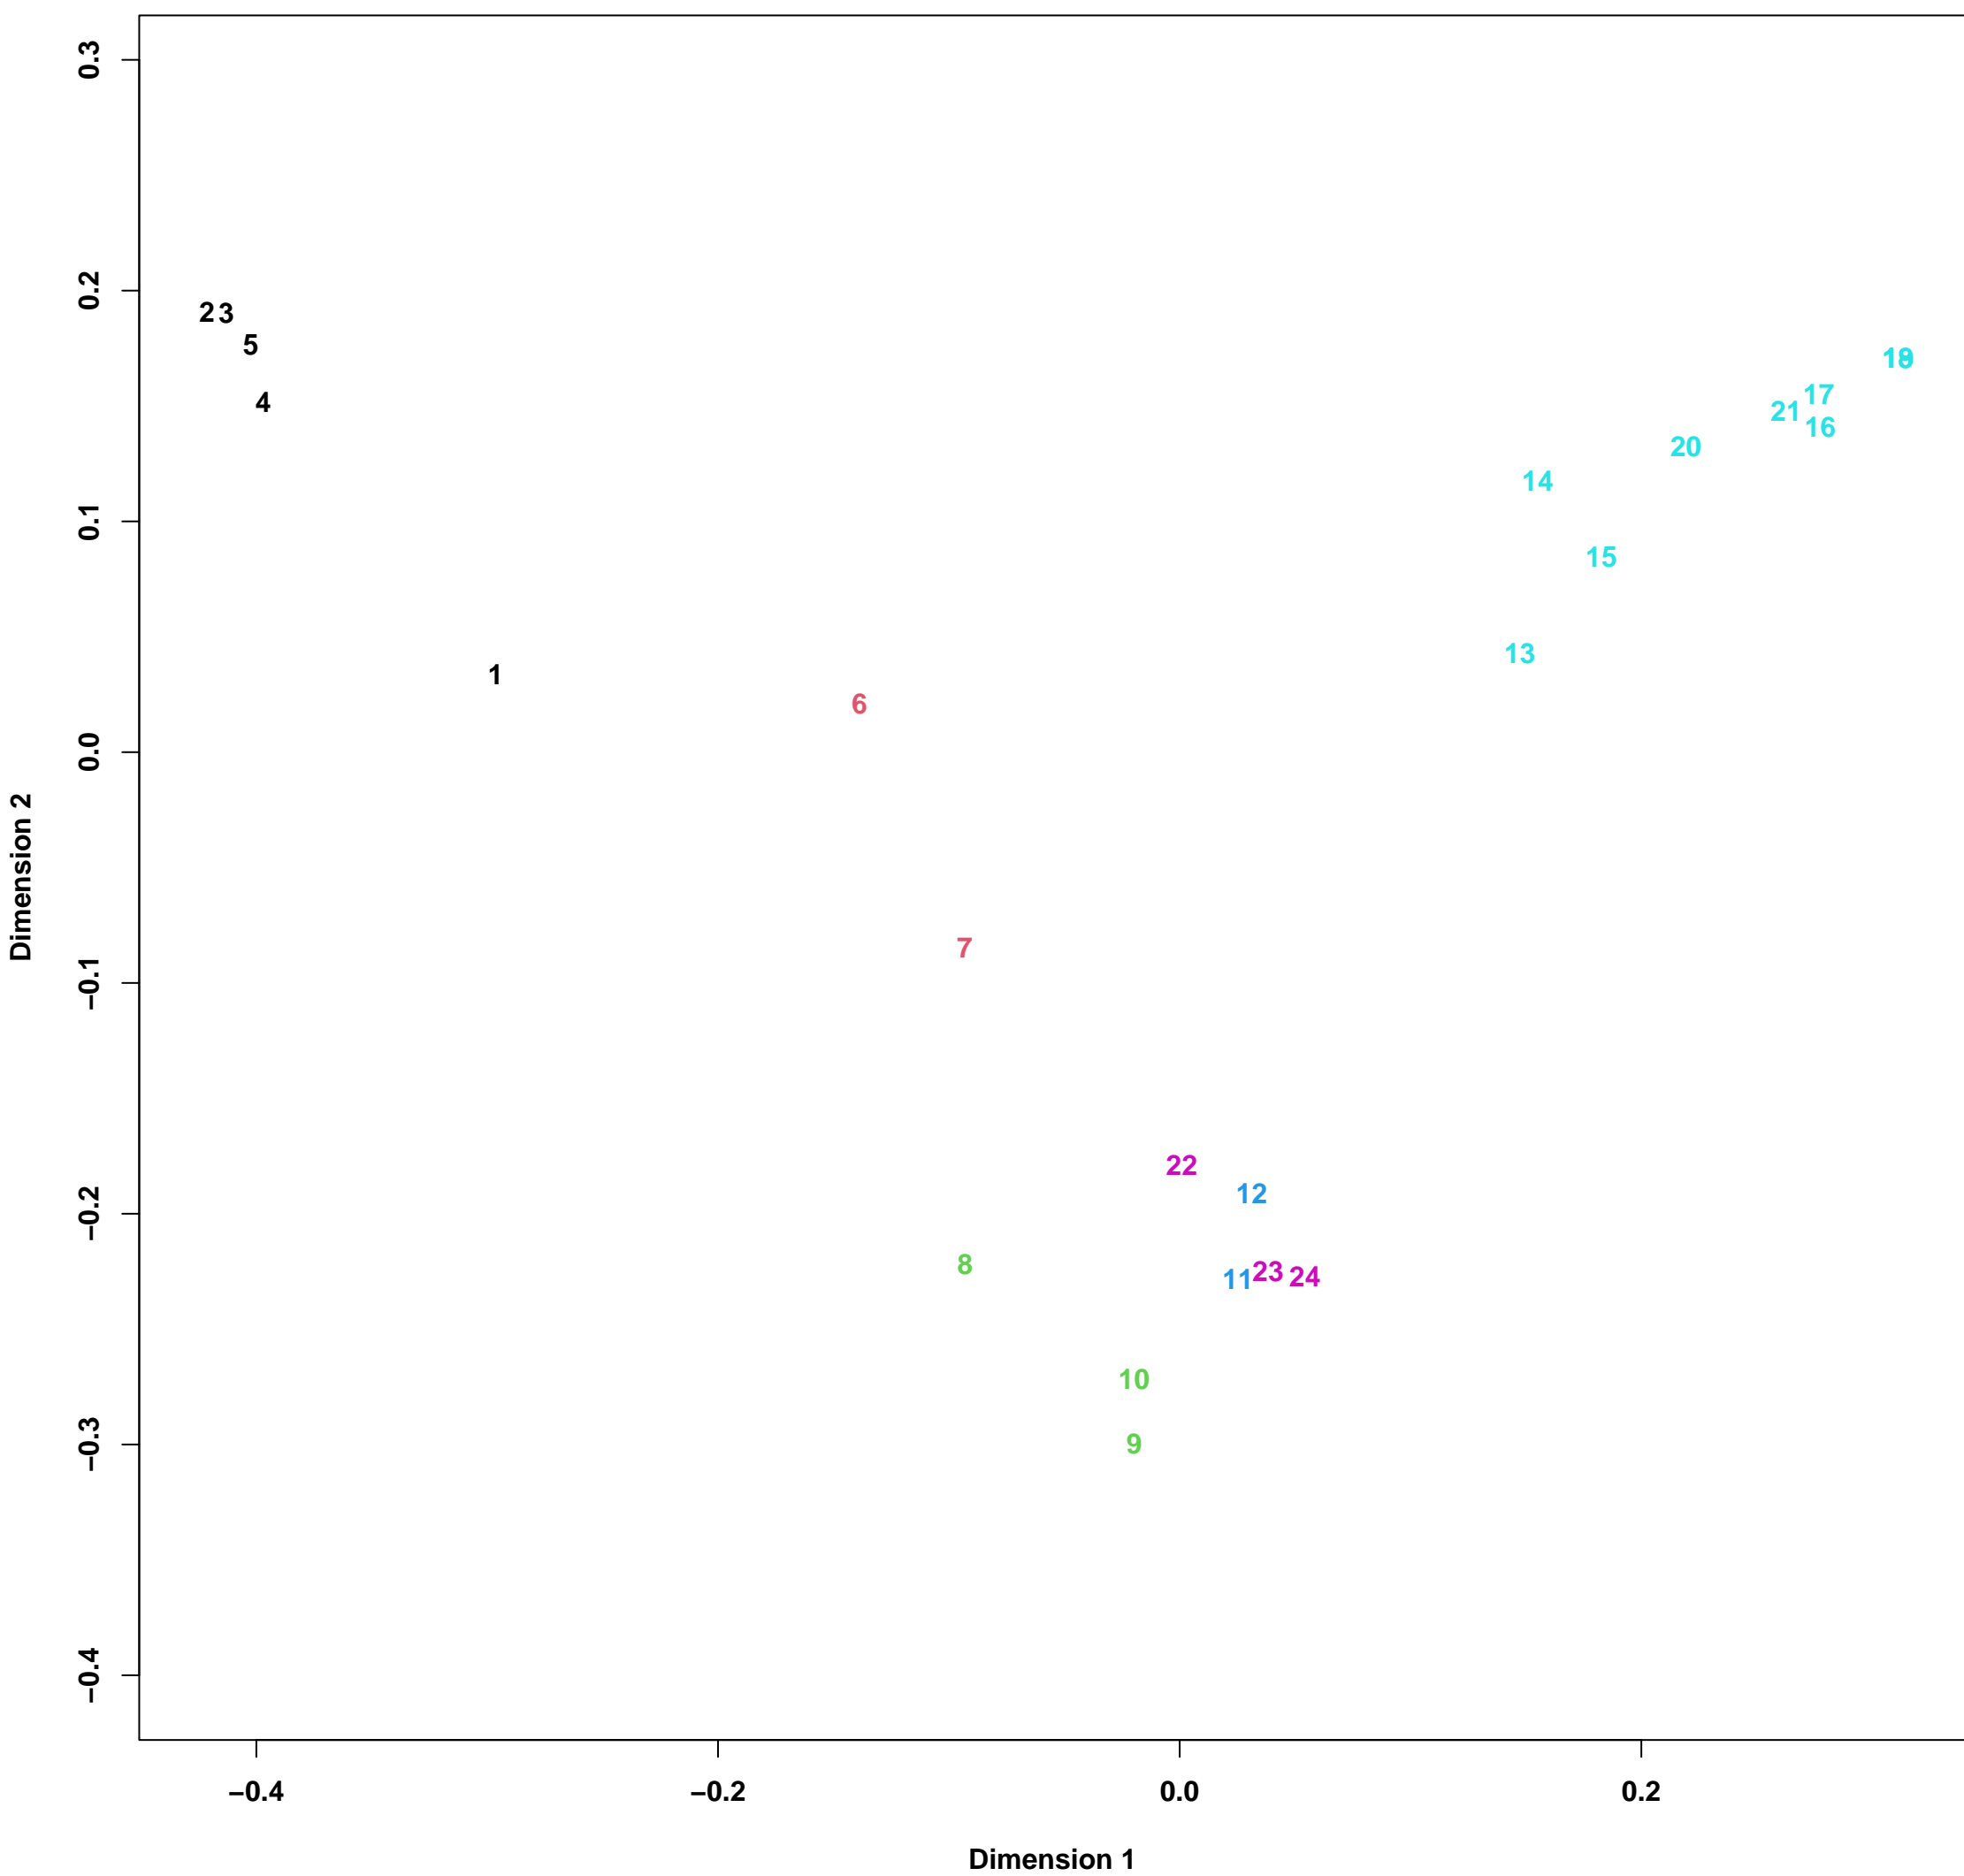

- 1 tr|Q4FTU5|Q4FTU5\_PSYA2
- 2 tr|A0A106BYZ8|A0A106BYZ8\_SHEFR
- 3 tr|Q086W1|Q086W1\_SHEFN
- 4 tr|Q3K9W6|Q3K9W6\_PSEPF
- 5 tr|Q8X665|Q8X665\_ECO57
- 6 tr|B9KY91|B9KY91\_THERP
- 7 tr|B9KYG0|B9KYG0\_THERP
- 8 tr|A4XKJ5|A4XKJ5\_CALS8
- 9 tr|Q5KXL5|Q5KXL5\_GEOKA
- 10 sp|P35150|DACB\_BACSU
- 11 sp|P08750|DACA\_BACSU
- 12 tr|Q5L3Y3|Q5L3Y3\_GEOKA
- 13 tr|Q4FTW2|Q4FTW2\_PSYA2
- 14 tr|A0A0H3JIB3|A0A0H3JIB3\_ECO57
- 15 tr|Q3K6A1|Q3K6A1\_PSEPF
- 16 tr|A1SZ14|A1SZ14\_PSYIN
- 17 tr|Q3IJ78|Q3IJ78\_PSET1
- 18 tr|A0A119D0G3|A0A119D0G3\_SHEFR
- 19 tr|Q087L2|Q087L2\_SHEFN
- 20 tr|Q8X6U3|Q8X6U3\_ECO57
- 21 sp|P0AEB4|DACA\_ECO57
- 22 tr|A4XK96|A4XK96\_CALS8
- 23 tr|Q5KXJ0|Q5KXJ0\_GEOKA
- 24 sp|P38422|DACF\_BACSU
