# Supplementary material for: Comparative Modeling and Analysis of Extremophilic D-Ala-D-Ala Carboxypeptidases
Source: MDPI journal article supplement (doi:10.3390/biom13020328), 2023-02-09

### Mean Core Number by Secondary Structure

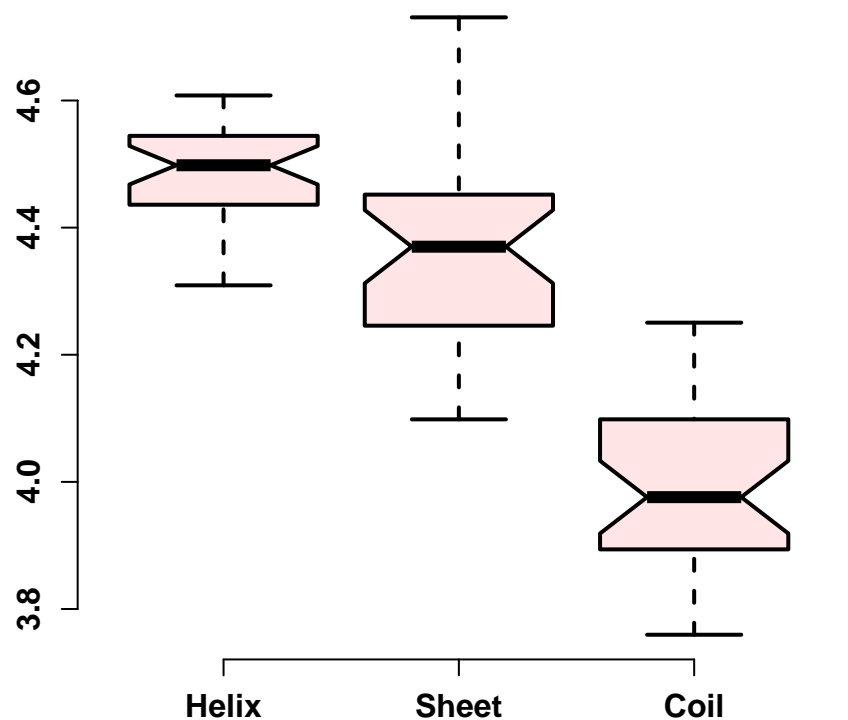

### Mean Core Number by Temperature (Helix)

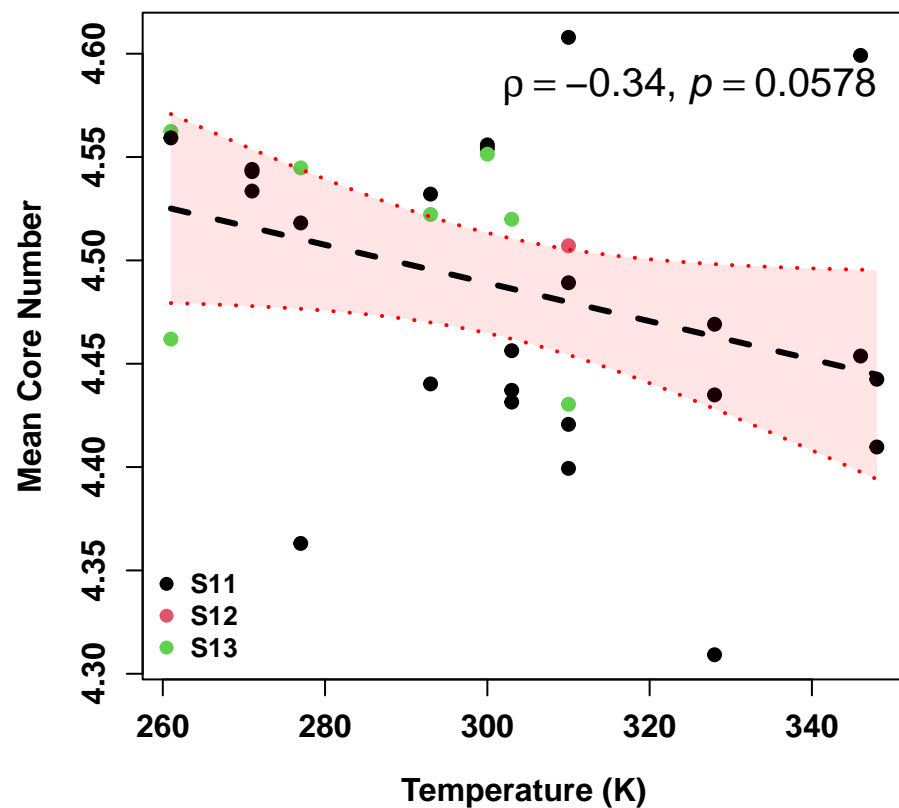

### Mean Core Number by Temperature (Sheet)

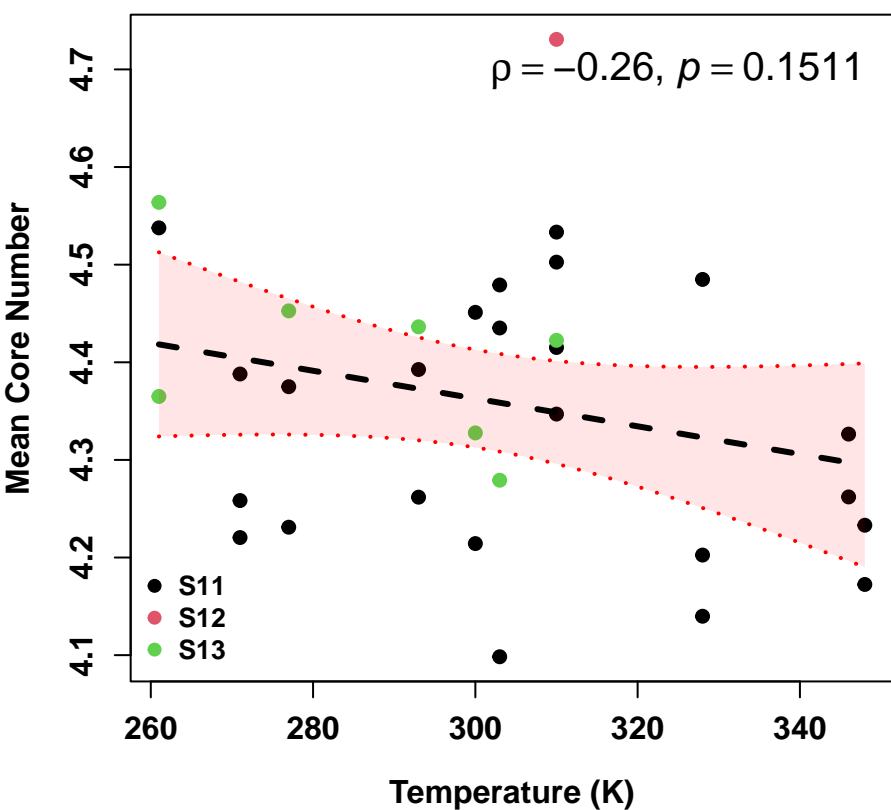

### Mean Core Number by Temperature (Coil)

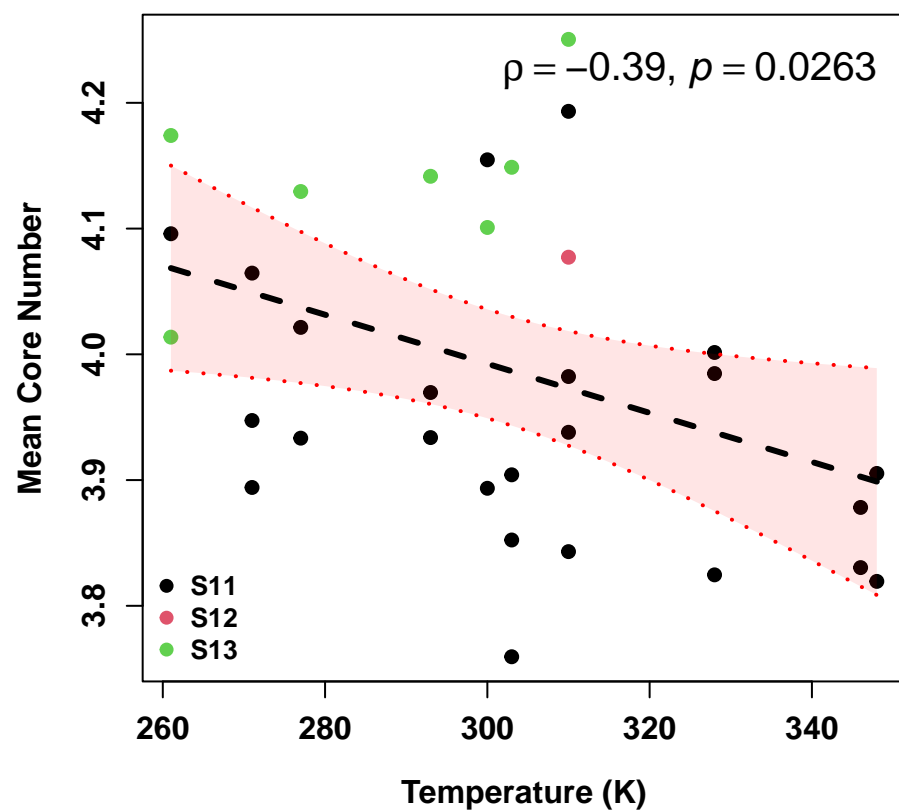

Supplement: s1 [file s1]
