# Supplementary material for: Comparative Modeling and Analysis of Extremophilic D-Ala-D-Ala Carboxypeptidases
Source: MDPI journal article supplement (doi:10.3390/biom13020328), 2023-02-09
Supplement: s1 [file s1]

YFEW\_ECO57 MKRTMLYLSL LAVSCSVSAA KYPVLTESSP EKAGFNVERL NQMDRWISQQ VDAGYPGVNL LIIKDNQIVY RKAWGAAKKY DGSVLMAQPV KATTGTLYDL

YFEW\_ECO57 ASNTKMYATN FALQKLMS<sup>↓</sup>EG <sup>↓</sup>KLHPDDLIAK YISGFADSPN DTIKGKNTLR ISDLLHHS GG FPADPQYPNK AVAGALYSQD KGQTL<sup>↓</sup>EMIKR TPLEYQPGSK

YFEW\_ECO57 HIYSDVDYML LGFIVESVTG QPLDRY<sup>↓</sup>VEES IYRPLGLTHT VFNPLLKGFK PQQIAATELN GNTRDGV<sup>↓</sup>IHF PNIR<sup>↓</sup>TSTHWG QVHDEKAFYS MGGVSGHAGL

YFEW\_ECO57 FSNTGDI<sup>↓</sup>AVL MQTMLNGGGY GDVQLFSAET VKMFTTSSKE DATFGLGWRV NGNATMTPTF GTLASPQTYG HTGWTGT<sup>↓</sup>VTV IDPVNHMAIV MLSN<sup>↓</sup>KPHSPV

YFEW\_ECO57 ADPQKNPNMF ESGQLPIATY GWVVDQVYAA LKQK

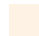

signal sequence

XX

signal cleavage site

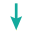

active Ser residue

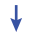

active Lys residue

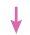

active Tyr residue
