# Supplementary material for: Comparative Modeling and Analysis of Extremophilic D-Ala-D-Ala Carboxypeptidases
Source: MDPI journal article supplement (doi:10.3390/biom13020328), 2023-02-09

**S11 A**

DACF\_BACSU

Q5KXJ0\_GEOKA

A4XK96\_CALS8

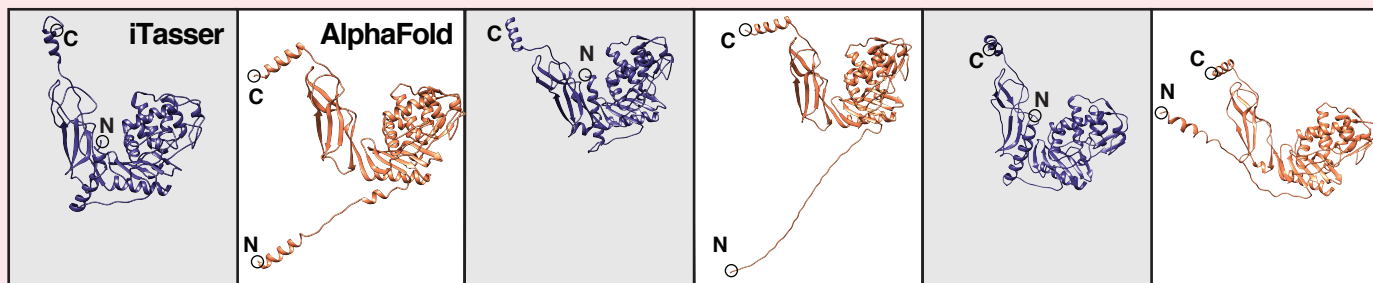**S11 B**

Q3K6A1\_PSEPF

Q3IJ78\_PSET1

A1SZ14\_PSYIN

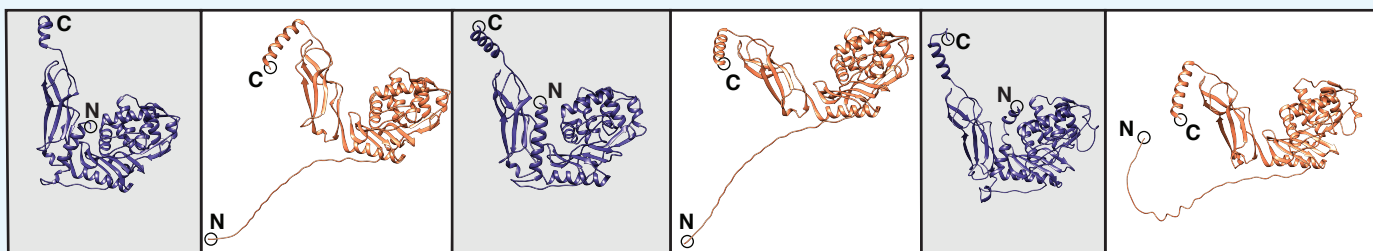**S11 C**

Q3K9W6\_PSEPF

A0A106BYZ8\_SHEFR

Q086W1\_SHEFN

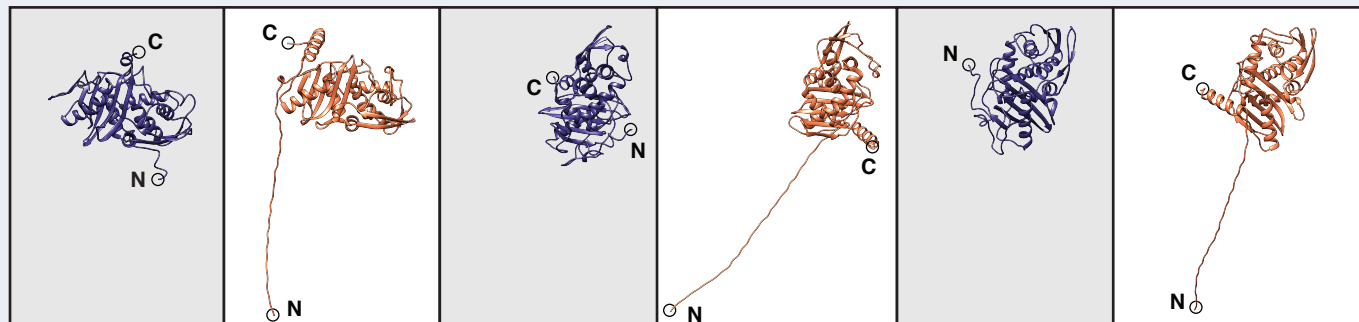**S13**

Q3KFC3\_PSEPF

Q082P9\_SHEFN

Q8X9KB\_ECO57

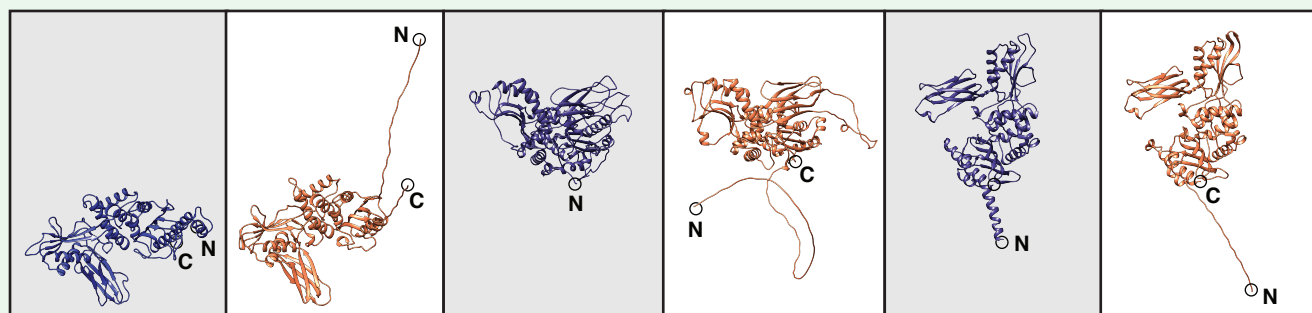

Supplement: s1 [file s1]
