# Supplementary figures and images for: Comparative Modeling and Analysis of Extremophilic D-Ala-D-Ala Carboxypeptidases
Source: MDPI journal article supplement (doi:10.3390/biom13020328), 2023-02-09

# Relative Secondary Structure Composition of Sequences by Sequence Cluster

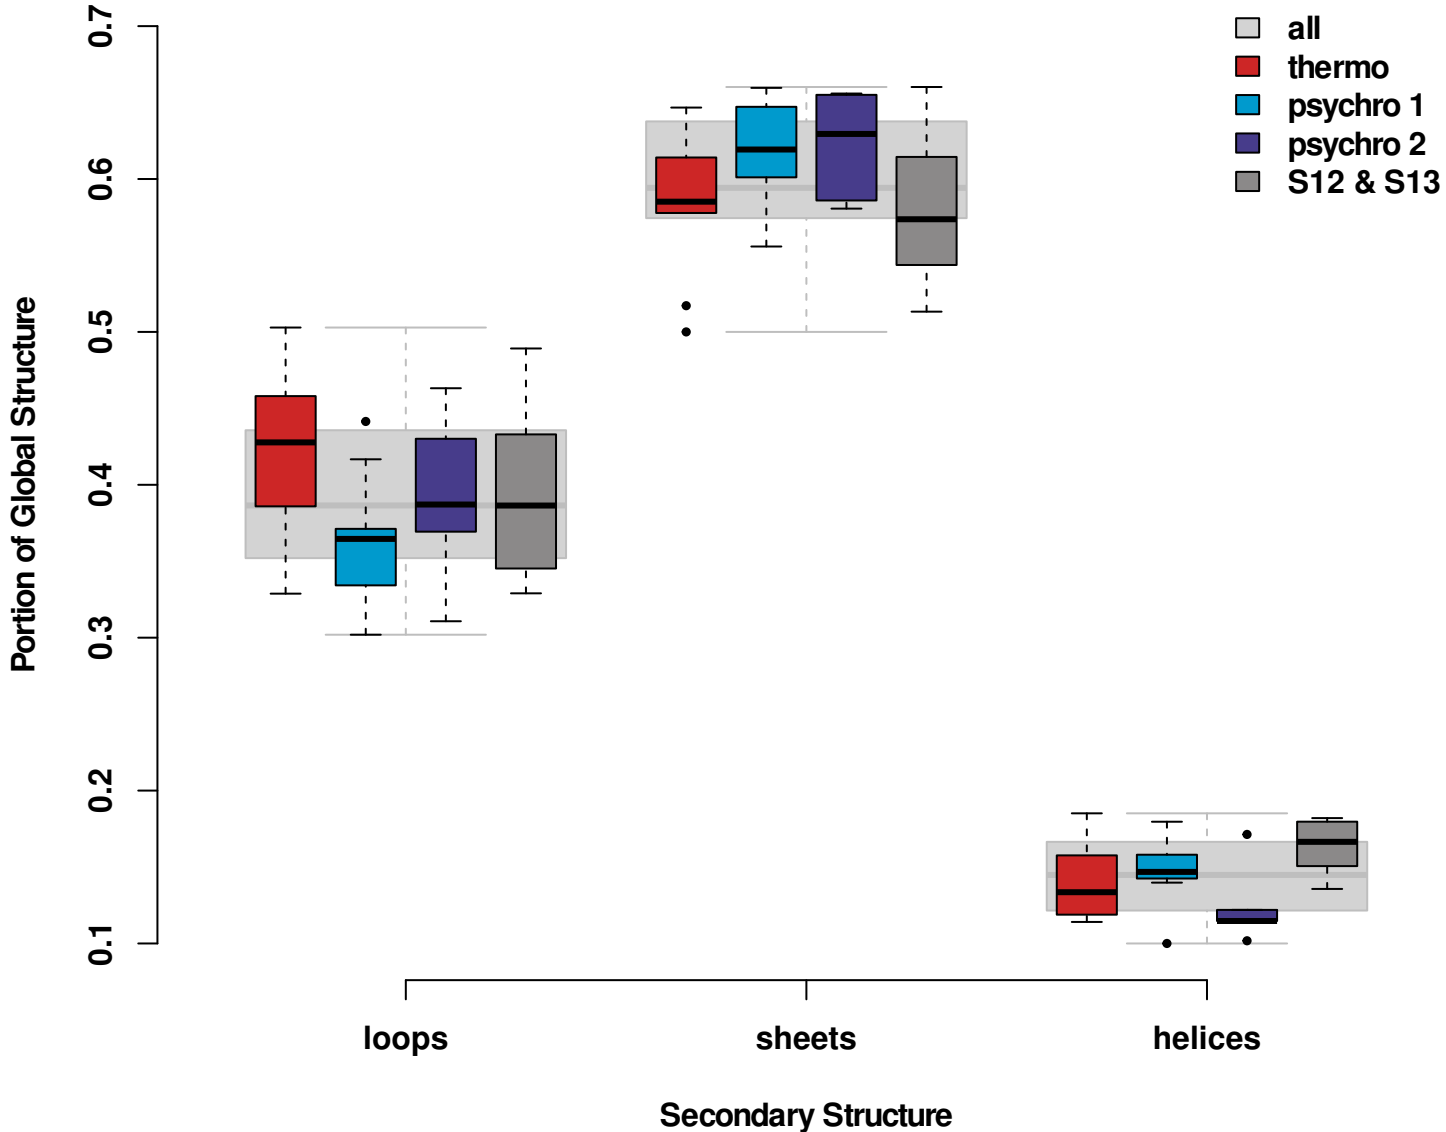

Supplement: s1 [file s1]

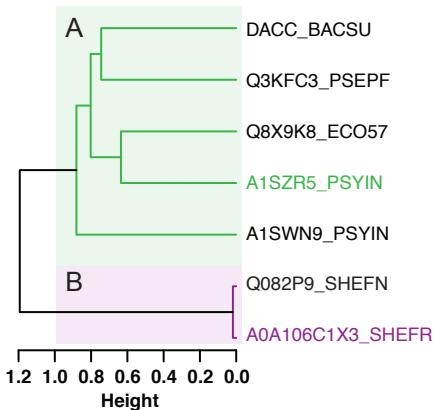

Supplement: s1 [file s1]

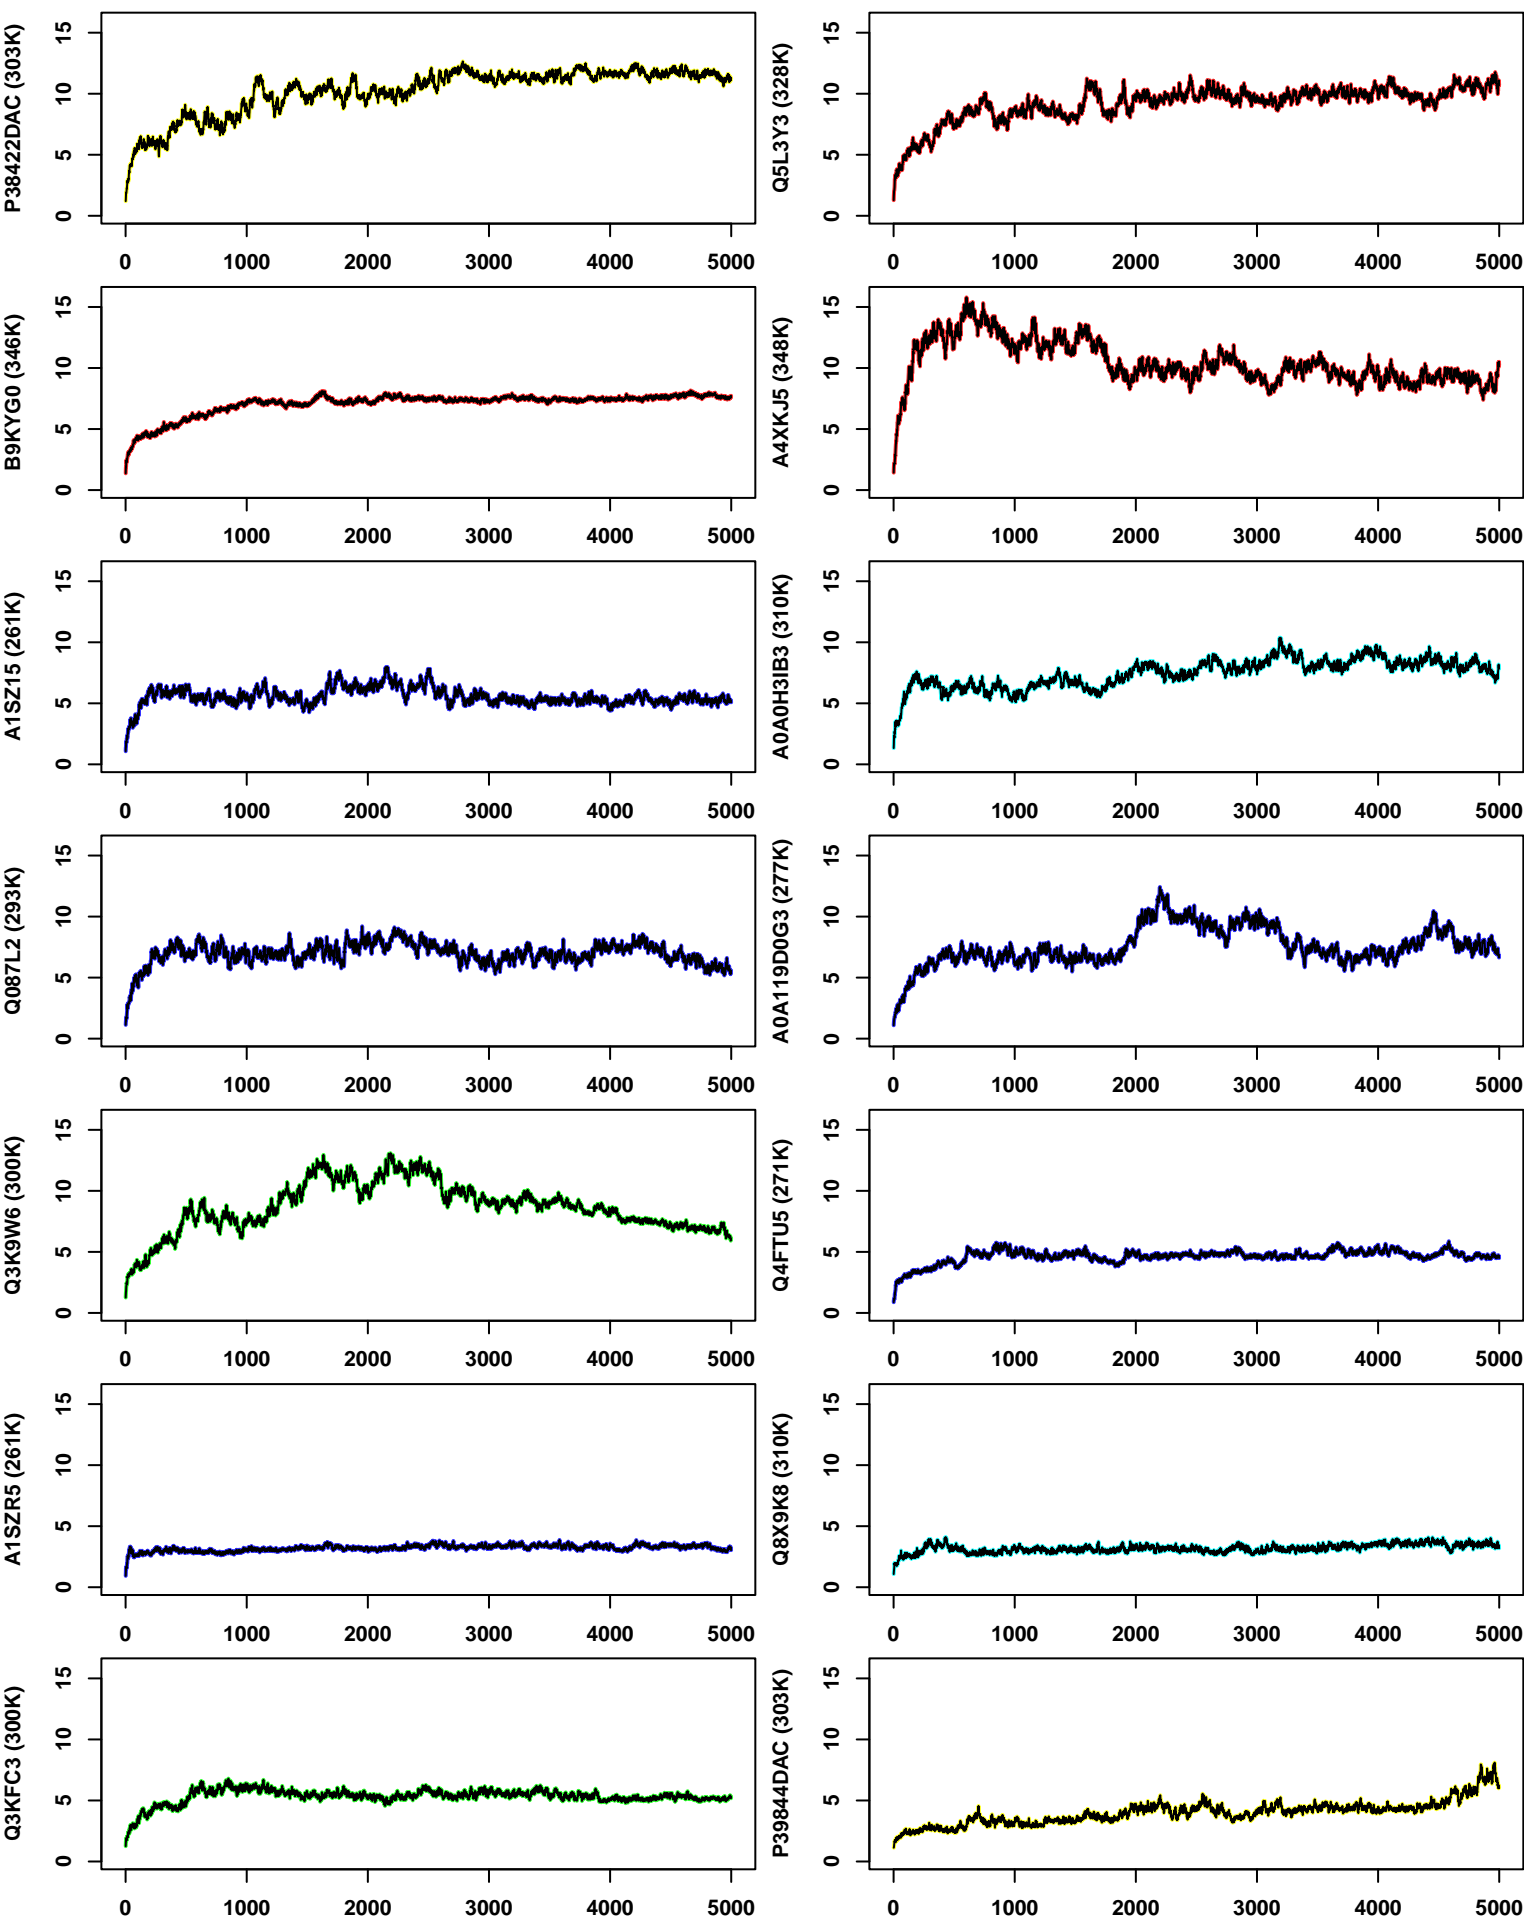

Supplement: s1 [file s1]

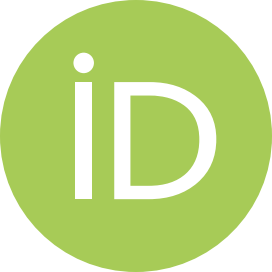

Supplement: s1 [file s1]

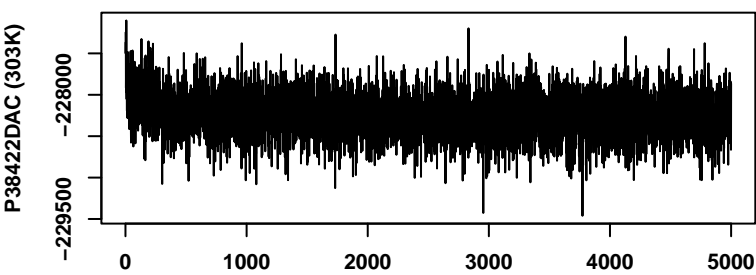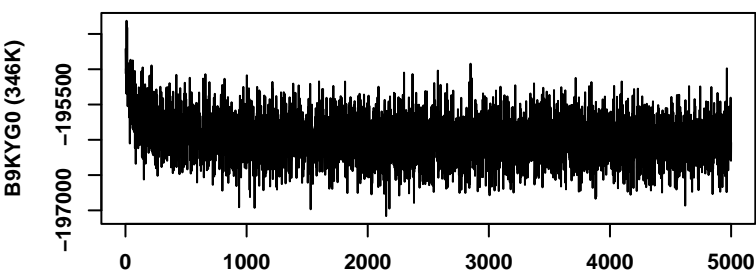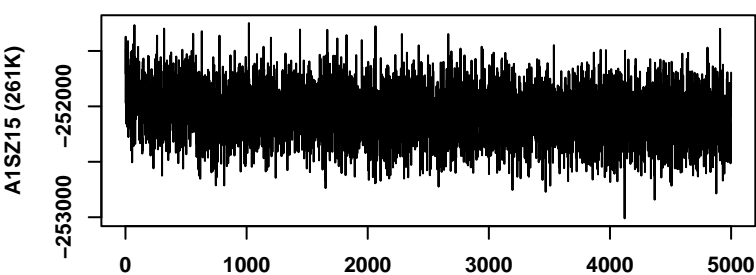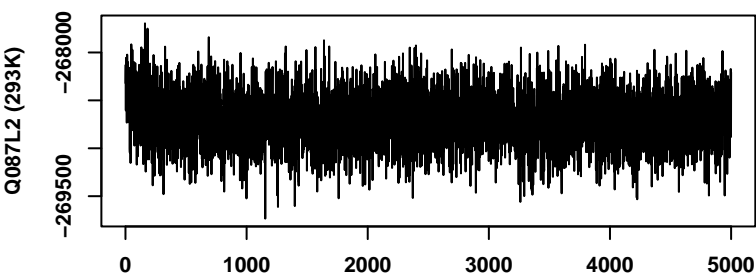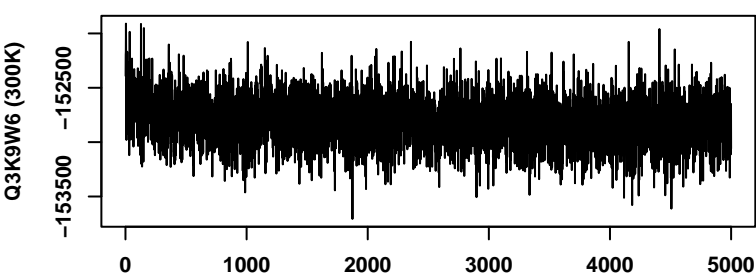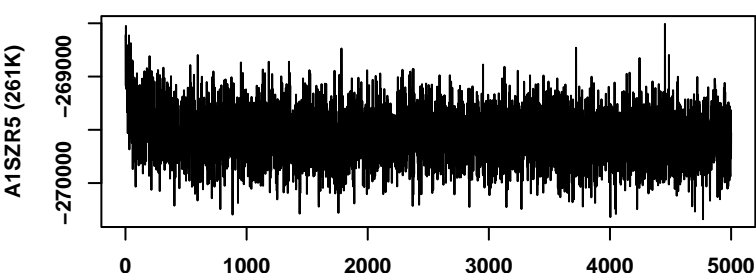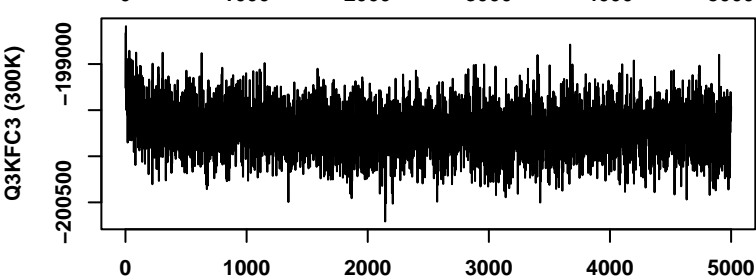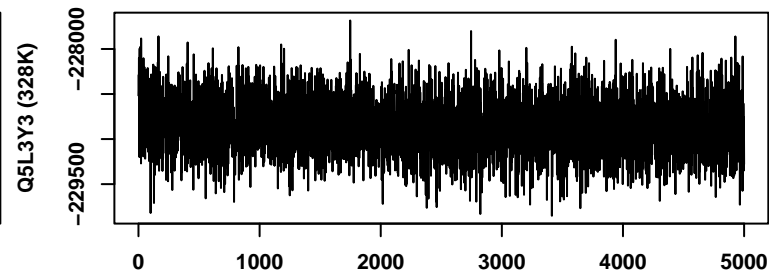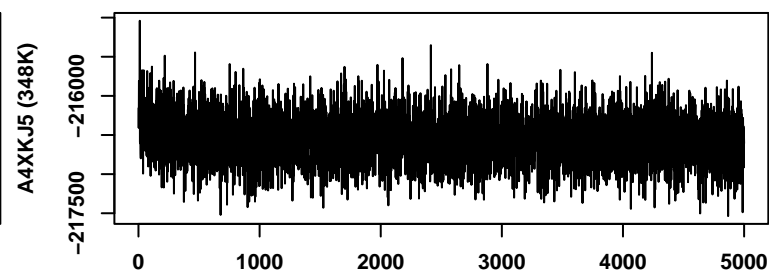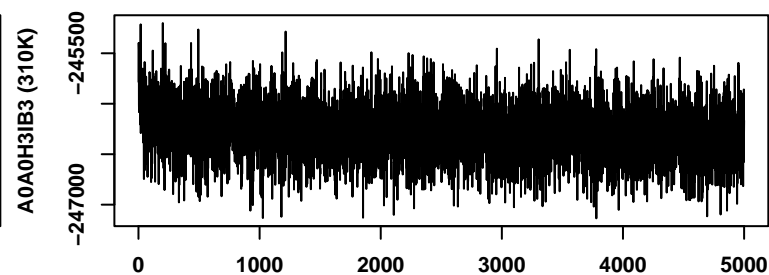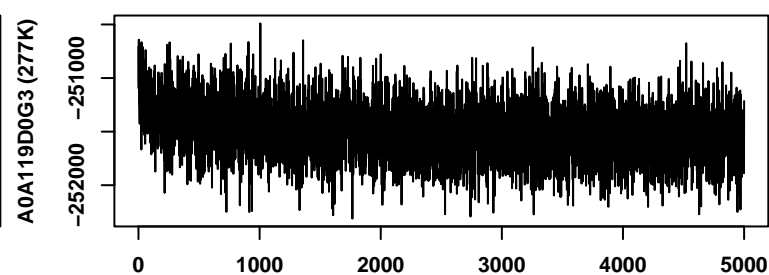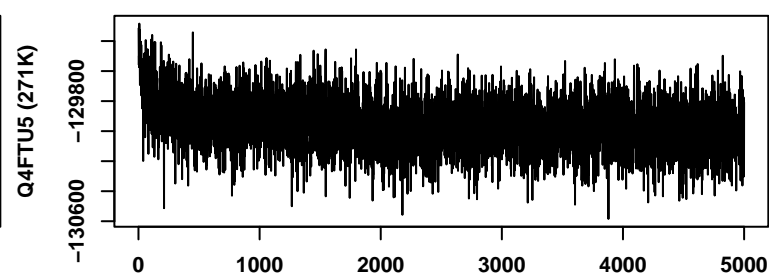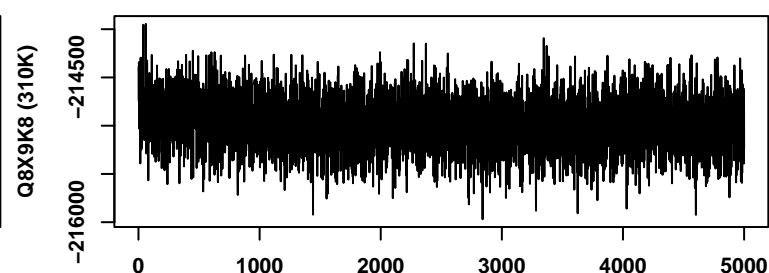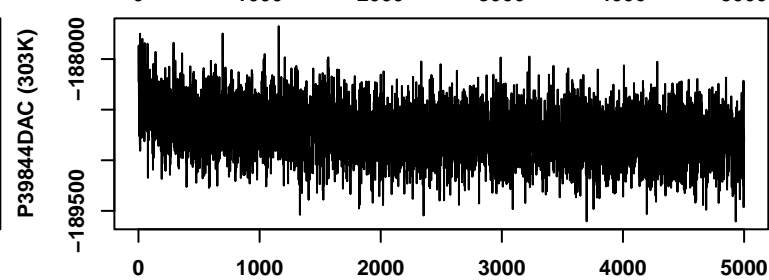

Supplement: s1 [file s1]

**A4XKJ5\_CALS8**

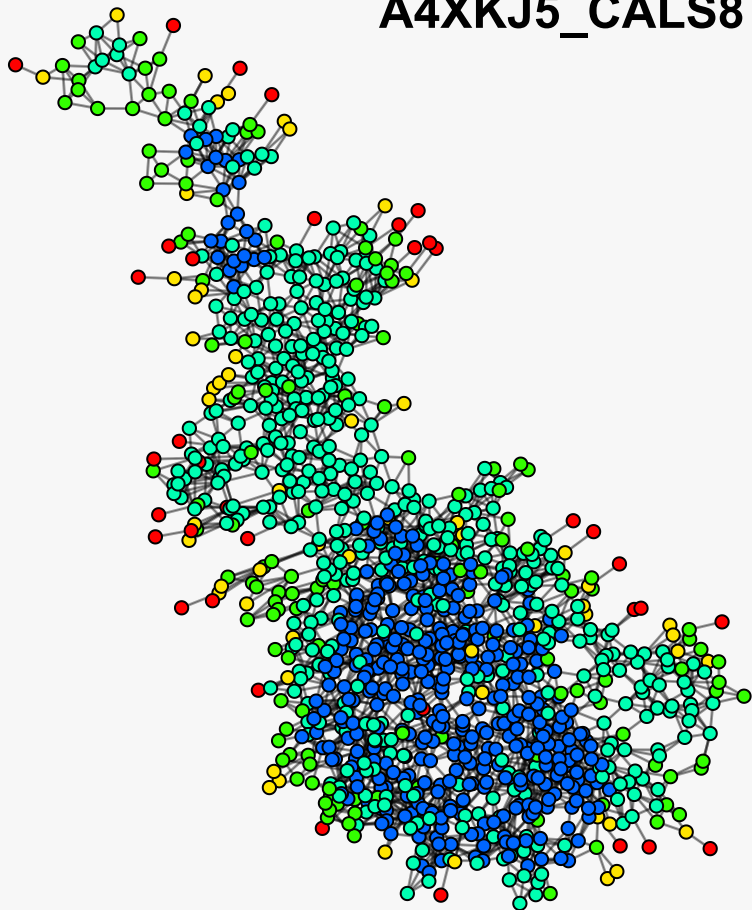

**DACA\_ECO57**

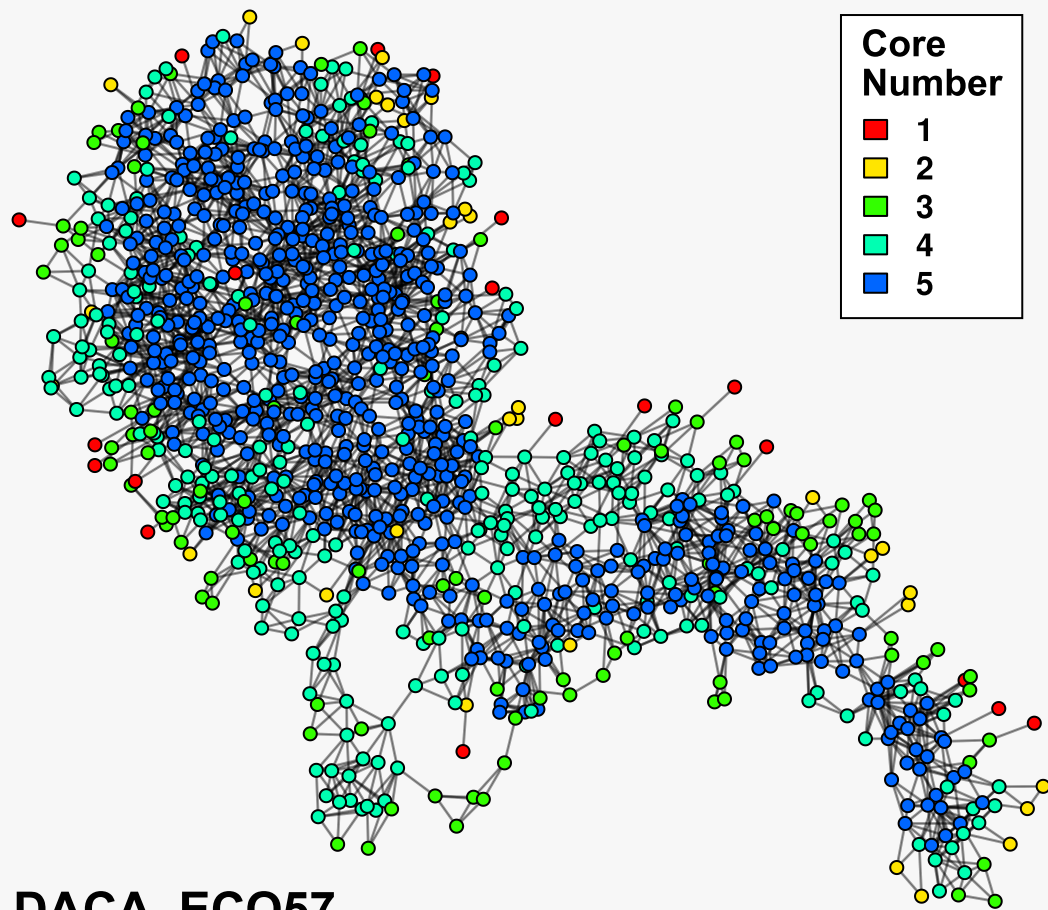

Supplement: s1 [file s1]

**A**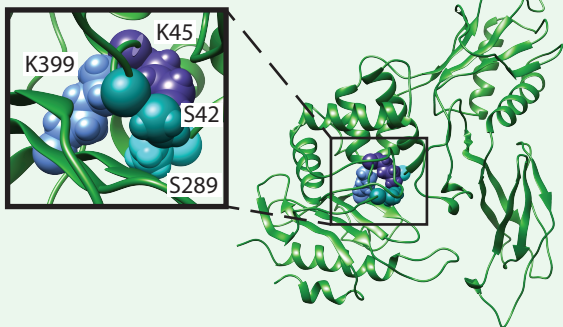**B**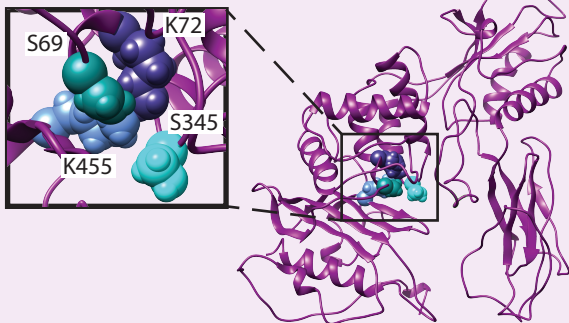**C**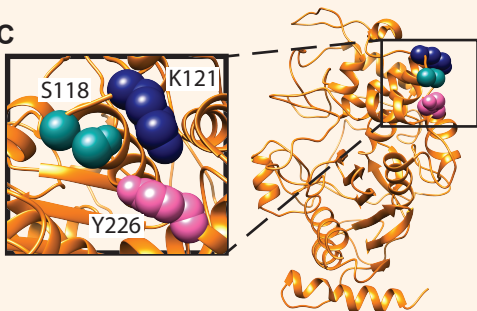

Supplement: s1 [file s1]
